# Supplementary material for: Impact of para aortic lymph node removal on survival following resection for pancreatic adenocarcinoma
Source: Springer Nature journal article supplement (doi:10.1186/s12893-023-02123-2), 2023-08-01
Supplement: MOESM1 [file 25875008]

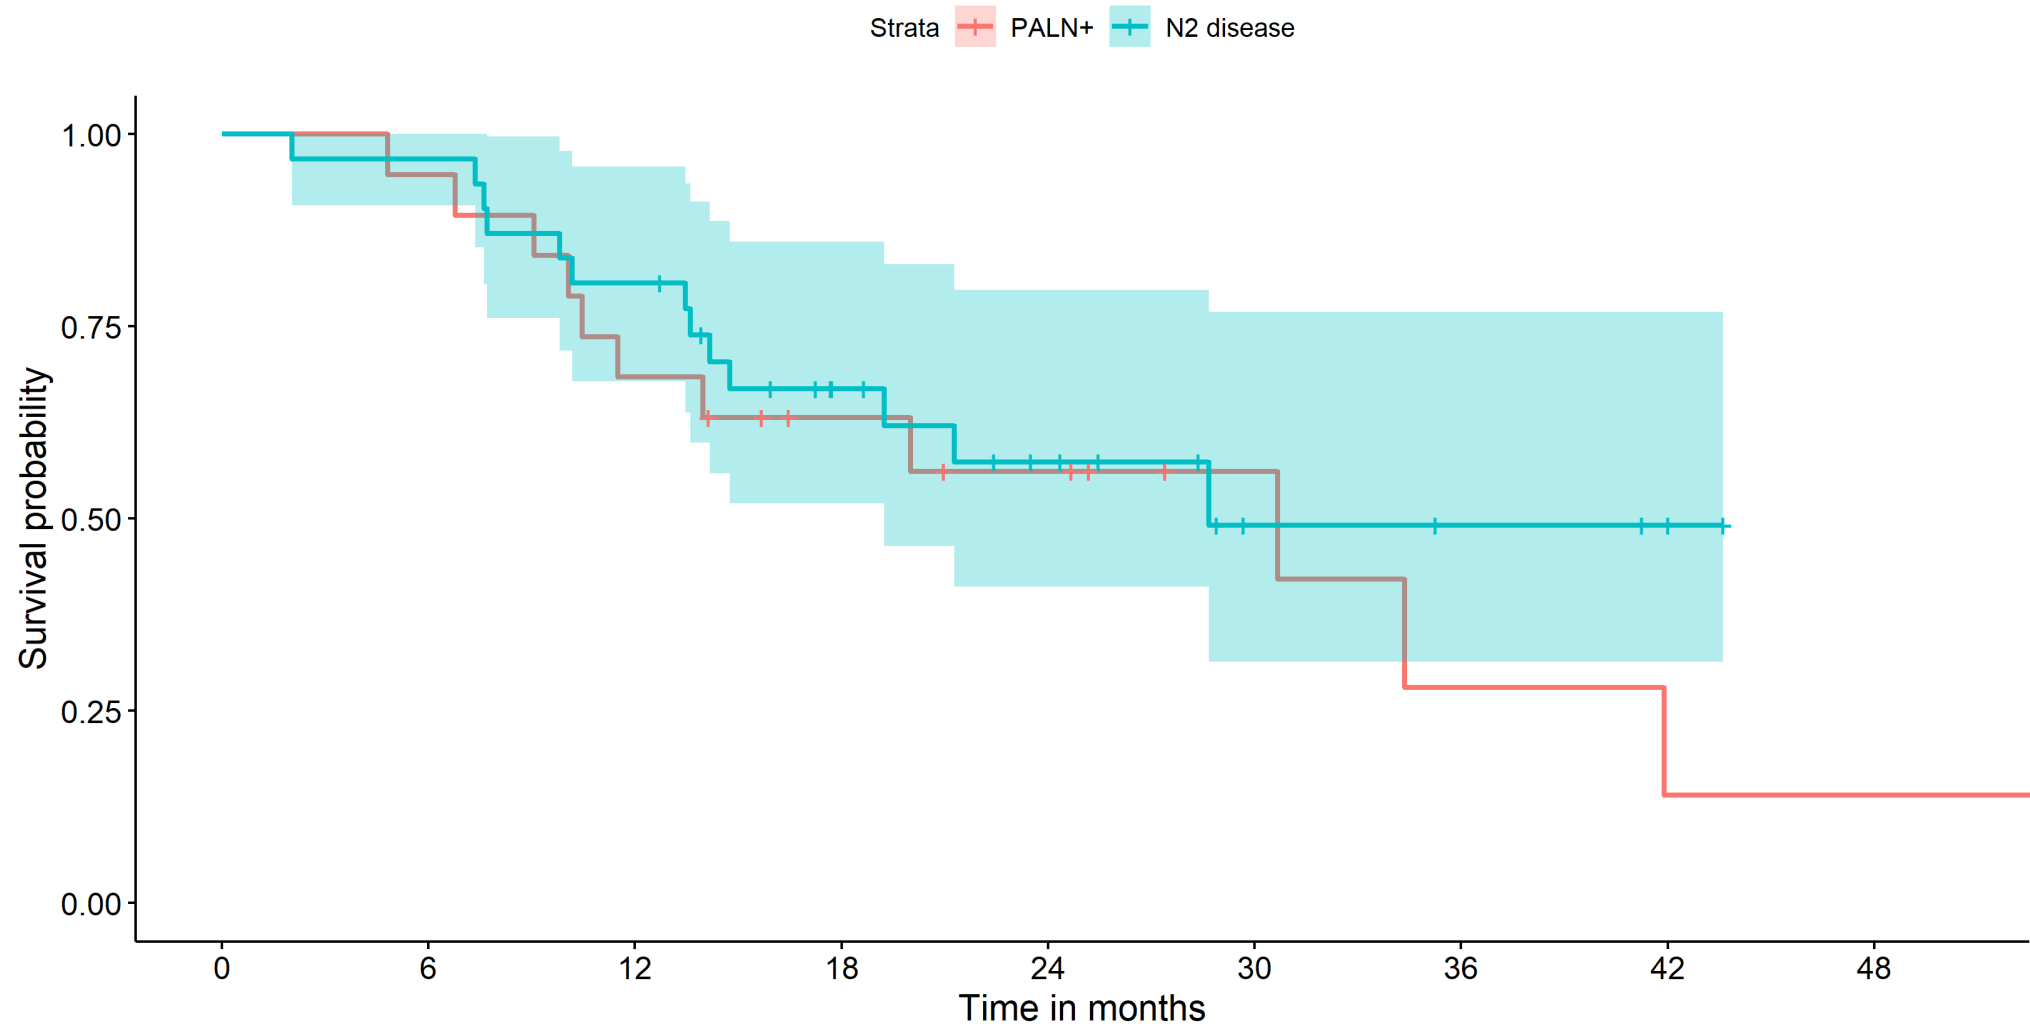

**Supplementary figure 1:** Kaplan-Meier survival curves comparing patients with paraaortic lymph node metastasis (PALN+) with patients without PALN metastasis but histological N2 disease. As seen, PALN+ status survival was comparable to survival for N2 patients, which was confirmed by log-rank test ( $p=0.50$ )
